# Supplementary material for: Predicting Infectivity: Comparing Four PCR-based Assays to Detect Culturable SARS-CoV-2 in Clinical Samples
Source: bioRxiv or medRxiv preprint supplement (doi:10.1101/2021.07.14.21260544), 2021-07-18

Fig S1

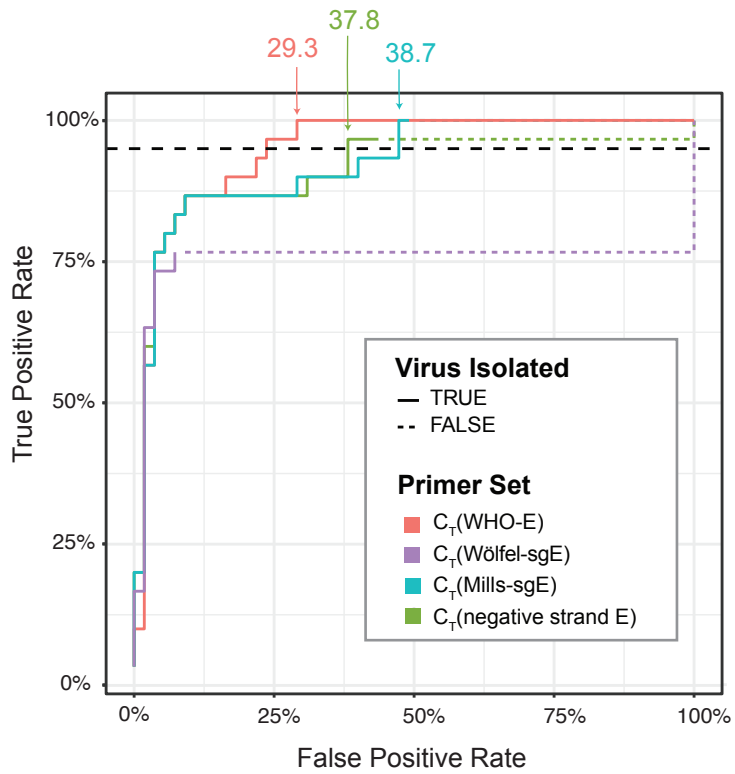

Supplement: Supplementary file [file media-3.pdf]
